# Supplementary material for: The first members of the octasubstituted naphthalene spider-host series with type I (abababab) conformation: gateway to new nano-host gas storage materials
Source: Royal Society of Chemistry journal article supplement (doi:10.1039/c0cc00655f), 2010-01-01
Supplement: c0cc00655f.pdf [file c0cc00655f.pdf]

**The first members of the octasubstituted naphthalene spider-host series with type I (*abababab*) conformation : gateway to new nano-host gas storage materials.**

Louis J. Farrugia,<sup>a</sup> James H. Gall,<sup>a</sup> David D. MacNicol<sup>a,\*</sup> and Ross MacSween<sup>a</sup>

**Supplementary Material**

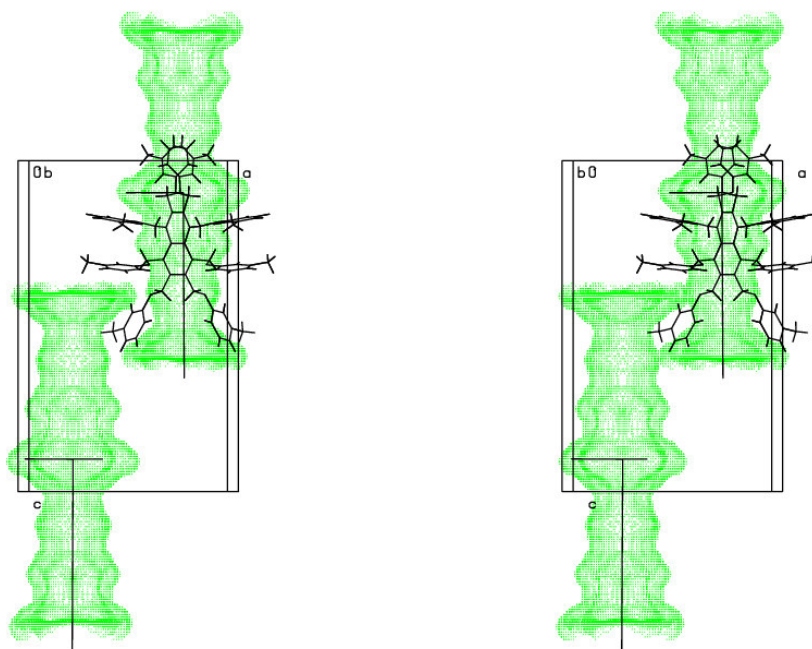

Fig S1. Stereoview of the solvent accessible cavities in the crystal structure of **3** (tetraglyme adduct)

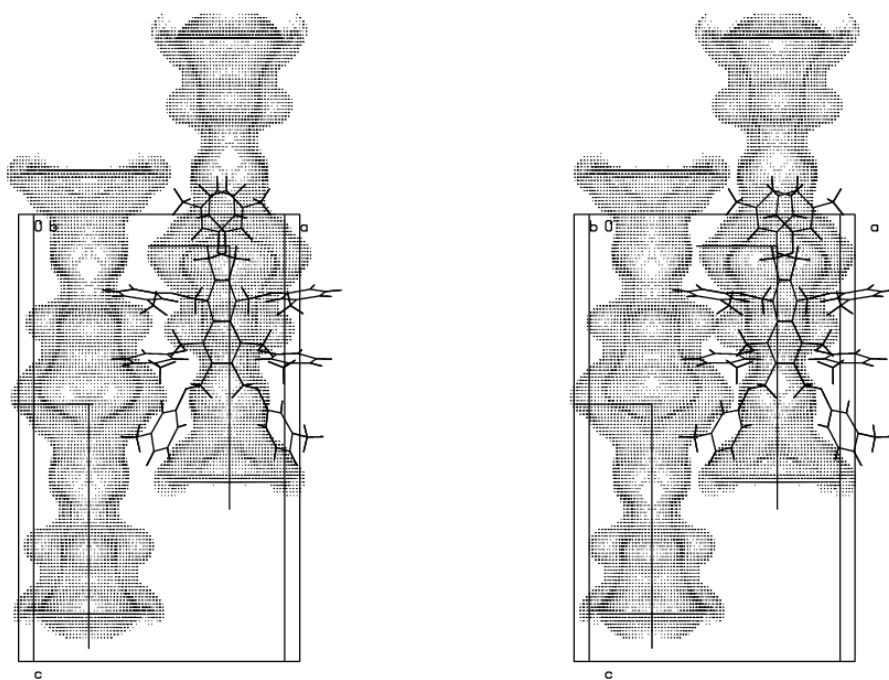

Fig S2. Stereoview of the solvent accessible cavities in the crystal structure of **3** (CS<sub>2</sub> adduct)

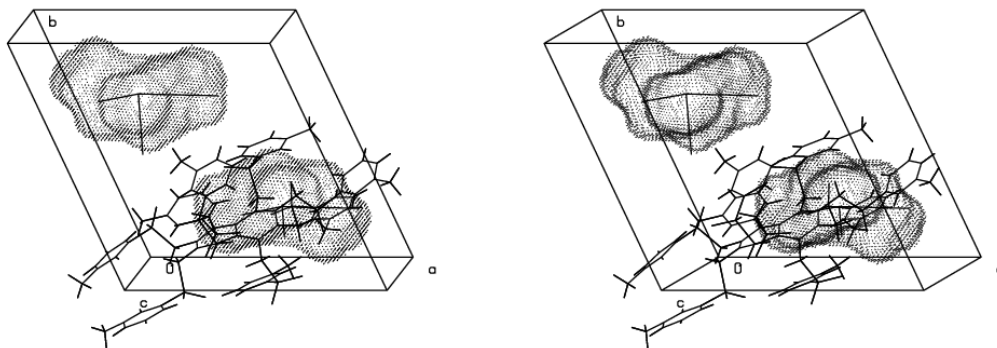

Fig S3. Stereoview of the solvent accessible cavities in the crystal structure of **7** (DMSO adduct)

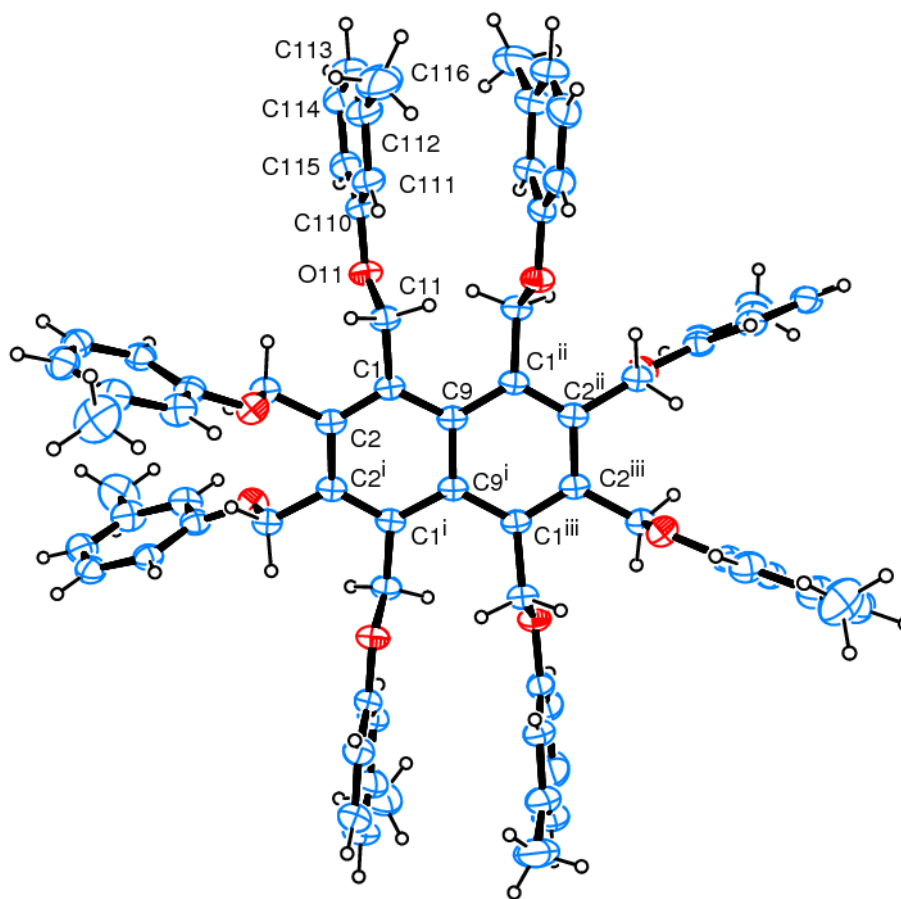

Fig S4. ORTEP plot of compound **3** (tetraglyme adduct) viewed normal to the naphthalene plane. Symmetry codes: (i)  $3/2-x, 1/2-y, z$ ; (ii)  $1/2+y, -1/2+x, 1/2-z$ ; (iii)  $1-y, 1-x, 1/2-z$ ;

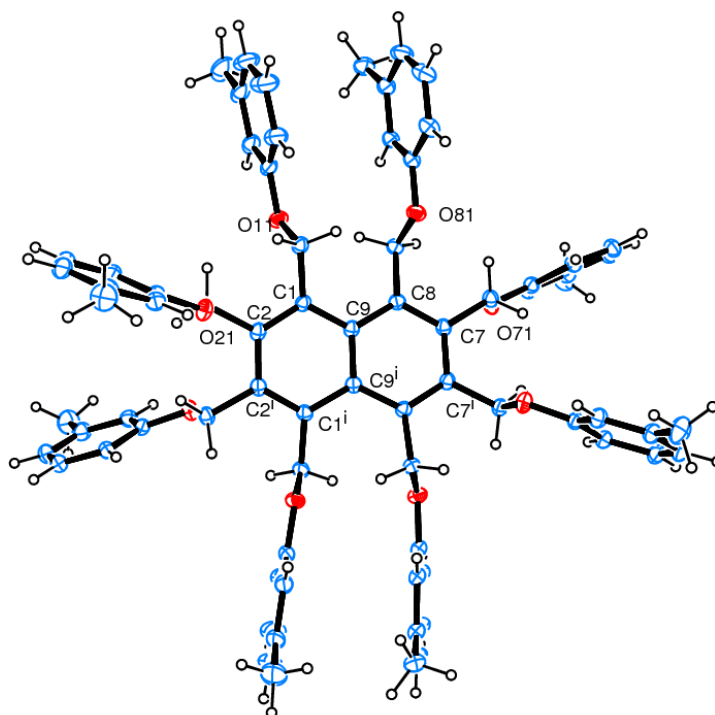

Fig S5. ORTEP plot of compound **3** (CS<sub>2</sub> adduct) viewed normal to the naphthalene plane. Symmetry codes: (i) 3/2-x, 1/2-y, z

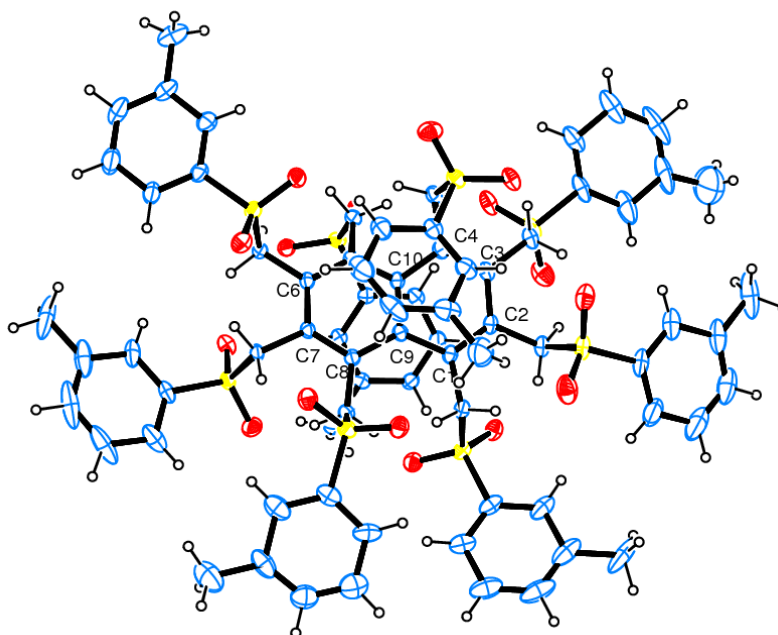

Fig S6. ORTEP plot of compound **7** (DMSO adduct) viewed normal to the naphthalene plane.
